# Supplementary material
Source: PubMed Central journal article supplement (PMC2268172)
Supplement: supp_0707730105_07730Fig4.pdf [file supp_0707730105_07730Fig4.pdf]

I

*D1S240*  
*D1S412*  
*D1S2816*  
*D1S413*  
*D1S456*  
*D1S249*  
*D1S2636*  
*D1S2735*  
*D1S2796*  
*D1S2692*

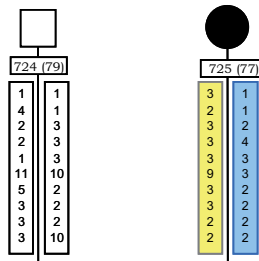

a

II

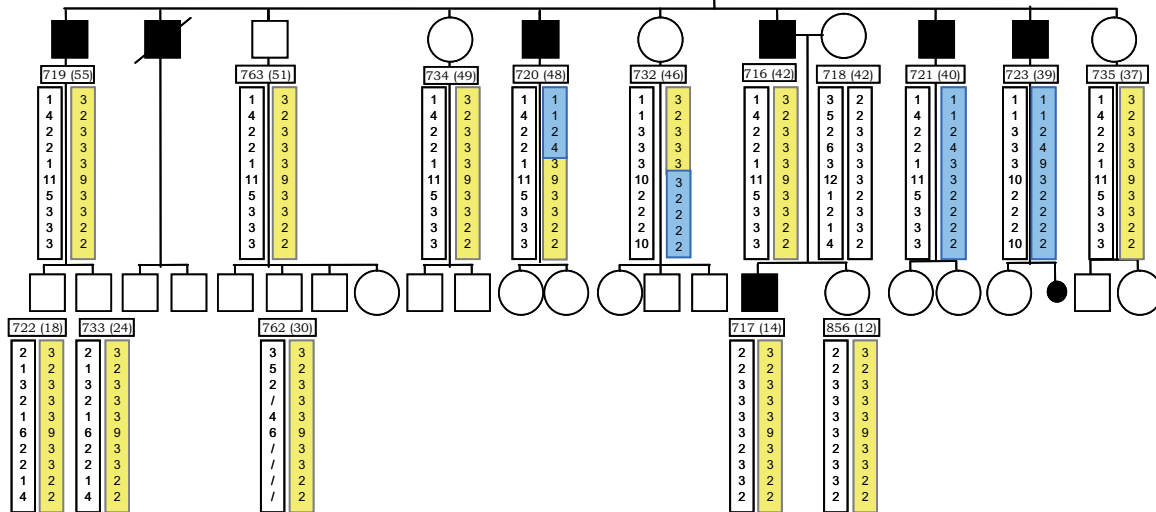

b

| Mb     | Marker         | LOD score<br>( $\theta=0.0$ ) |
|--------|----------------|-------------------------------|
| 181.92 | <i>D1S240</i>  | -16.72                        |
| 190.80 | <i>D1S412</i>  | -19.12                        |
| 193.38 | <i>D1S2816</i> | -8.02                         |
| 195.35 | <i>D1S413</i>  | -18.56                        |
| 202.19 | <i>D1S456</i>  | 0.30                          |
| 202.45 | <i>D1S249</i>  | -19.12                        |
| 203.02 | <i>D1S2636</i> | -18.94                        |
| 203.48 | <i>D1S2735</i> | -18.71                        |
| 204.15 | <i>D1S2796</i> | -0.23                         |
| 204.43 | <i>D1S2692</i> | -0.23                         |

Max SLINK=3.084

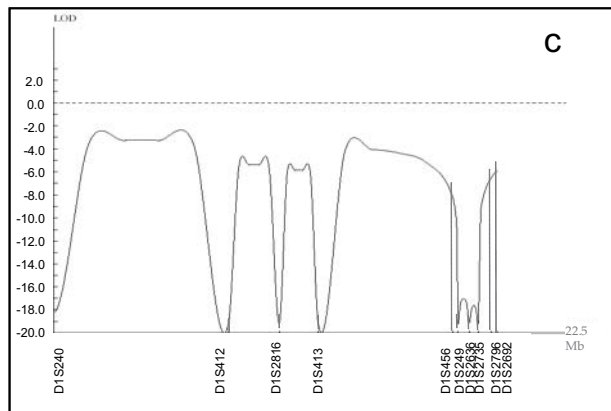

CFH

DAF  
 CRI  
 MCP
