# Supplementary material
Source: PubMed Central journal article supplement (PMC2268172)
Supplement: supp_0707730105_07730Fig5.pdf [file supp_0707730105_07730Fig5.pdf]

# GFND

## F468 (Italy)

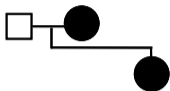

Microsatellite/gene position (Mb)

|                                    |             |     |     |       |     |     |       |
|------------------------------------|-------------|-----|-----|-------|-----|-----|-------|
| D2S153                             | 211,364,427 | 369 | 394 | ?     | ?   | ?   | ?     |
| D2S143                             | 214,681,353 | 129 | 139 | 137   | 139 | 129 | 137   |
| D2S1327                            | 214,768,084 | 171 | 171 | 175   | 171 | 171 | 175   |
| D2S1345                            | 214,873,842 | 198 | 204 | 195   | 201 | 198 | 195   |
| 2_685                              | 215,637,483 | 410 | 400 | 398   | 398 | 410 | 398   |
| <i>Fibronectin</i><br>A2918G;Y973C | 215,979,274 | A   | A   | Y973C | A   | A   | Y973C |
| 2_689                              | 215,980,807 | 210 | 206 | 210   | 206 | 210 | 210   |
| 2_690                              | 215,996,005 | 317 | 315 | 319   | 323 | 317 | 319   |
| 2_692                              | 216,179,343 | 141 | 135 | 141   | 141 | 141 | 141   |
| D2S2361                            | 216,186,672 | 255 | 265 | 255   | 255 | 255 | 255   |
| 2_693                              | 216,282,858 | 253 | 257 | 250   | 253 | 253 | 250   |
| 2_694                              | 216,359,752 | 244 | 246 | 244   | 244 | 244 | 244   |
| 2_695                              | 216,411,513 | 134 | 134 | 134   | 132 | 134 | 134   |
| 2_696                              | 216,442,674 | 245 | 245 | 241   | 245 | 245 | 241   |
| D2S137                             | 216,527,272 | 172 | 172 | 168   | 178 | 172 | 168   |
| D2S2382                            | 216,756,810 | 292 | 279 | 272   | 275 | 292 | 272   |
| D2S301                             | 217,595,318 | 242 | 257 | 242   | 248 | 242 | 242   |
| D2S2248                            | 217,647,195 | 186 | 195 | 197   | 211 | 186 | 197   |
| D2S164                             | 217,668,095 | 303 | 303 | 303   | 294 | 303 | 303   |
| D2S1371                            | 217,955,108 | 124 | 128 | 124   | 128 | 124 | 124   |
| D2S434                             | 218,284,719 | 283 | 295 | ?     | ?   | 295 | 280   |

## F546 (The Netherlands)

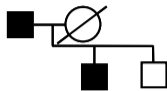

|       |     |       |     |       |     |
|-------|-----|-------|-----|-------|-----|
| 345   | 321 | 345   | 347 | 345   | 345 |
| 152   | 144 | 152   | 129 | 152   | 142 |
| 171   | 175 | 171   | 183 | 171   | 179 |
| 195   | 195 | 195   | 198 | 195   | 201 |
| 412   | 400 | 412   | 398 | 412   | 398 |
| Y973C | A   | Y973C | A   | Y973C | A   |
| 210   | 205 | 210   | 208 | 210   | 208 |
| 317   | 321 | 317   | 319 | 317   | 319 |
| 141   | 135 | 141   | 135 | 141   | 141 |
| 255   | 257 | 255   | 261 | 255   | 255 |
| 257   | 257 | 257   | 251 | 257   | 257 |
| 244   | 246 | 244   | 239 | 244   | 244 |
| 132   | 134 | 132   | 137 | 132   | 137 |
| 241   | 245 | 241   | 245 | 241   | 245 |
| 168   | 159 | 168   | 159 | 168   | 159 |
| 279   | 288 | 279   | 266 | 279   | 275 |
| 252   | 257 | 257   | 248 | 254   | 257 |
| 192   | 196 | 192   | 199 | 192   | 186 |
| 303   | 292 | 303   | 294 | 303   | 303 |
| 128   | 128 | 128   | 124 | 128   | 124 |
| 291   | 287 | 291   | 280 | 291   | 291 |

## F663 (Germany)

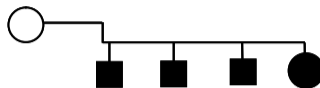

|     |     |       |     |       |     |       |     |
|-----|-----|-------|-----|-------|-----|-------|-----|
| 321 | 345 | 347   | 321 | 347   | 321 | 347   | 321 |
| 150 | 129 | 159   | 150 | 159   | 150 | 159   | 150 |
| 158 | 170 | 174   | 158 | 174   | 158 | ?     | ?   |
| 201 | 198 | 201   | 201 | 201   | 201 | 201   | 201 |
| ?   | ?   | 402   | 410 | 402   | 410 | 402   | 410 |
| A   | A   | Y973C | A   | Y973C | A   | Y973C | A   |
| 208 | 208 | 204   | 208 | 204   | 208 | 204   | 208 |
| 323 | 319 | 319   | 323 | 319   | 323 | 319   | 323 |
| 141 | 141 | 141   | 141 | 141   | 141 | 141   | 141 |
| 255 | 255 | 255   | 255 | 255   | 255 | 255   | 255 |
| 257 | 254 | 257   | 257 | 257   | 257 | 257   | 257 |
| 246 | 244 | 241   | 246 | 241   | 246 | 241   | 246 |
| 134 | 132 | 134   | 134 | 134   | 134 | 134   | 134 |
| 241 | 223 | 251   | 241 | 251   | 241 | 251   | 241 |
| 159 | 168 | 174   | 159 | 174   | 159 | 174   | 159 |
| 266 | 266 | 274   | 266 | 274   | 266 | 274   | 266 |
| 242 | 258 | 252   | 242 | 252   | 242 | 252   | 242 |
| 196 | 196 | 186   | 196 | 186   | 196 | 186   | 196 |
| 294 | 305 | 303   | 294 | 303   | 294 | 303   | 294 |
| 124 | 136 | 132   | 124 | 132   | 124 | 132   | 124 |
| 288 | 280 | 276   | 288 | 276   | 288 | 276   | 288 |

## F1098 (Japan)

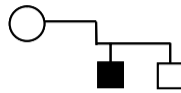

|     |     |                  |     |     |     |
|-----|-----|------------------|-----|-----|-----|
| 321 | 321 | 321              | 321 | 321 | 321 |
| 148 | 148 | 126              | 148 | 126 | 148 |
| 175 | 171 | 175              | 175 | 175 | 171 |
| 201 | 189 | 195              | 201 | 195 | 189 |
| 408 | 400 | 410              | 408 | 410 | 400 |
| A   | A   | de novo<br>Y973C | A   | A   | A   |
| 206 | 206 | 206              | 206 | 206 | 206 |
| 313 | 315 | 315              | 313 | 315 | 315 |
| 143 | 141 | 141              | 143 | 141 | 141 |
| 261 | 255 | 255              | 261 | 255 | 255 |
| 250 | 250 | 244              | 250 | 244 | 250 |
| 243 | 243 | 243              | 243 | 243 | 243 |
| 128 | 128 | 130              | 128 | 130 | 128 |
| 241 | 243 | 241              | 241 | 241 | 243 |
| 157 | 168 | 157              | 157 | 157 | 168 |
| 275 | 266 | 275              | 275 | 275 | 266 |
| 248 | 248 | 248              | 248 | 248 | 248 |
| 210 | 204 | 210              | 210 | 210 | 204 |
| 301 | 301 | 307              | 301 | 307 | 301 |
| 123 | 119 | 119              | 123 | 119 | 119 |
| 283 | 287 | 283              | 283 | 283 | 287 |
