# Supplementary material
Source: PubMed Central journal article supplement (PMC2268172)
Supplement: supp_0707730105_07730Fig7.pdf [file supp_0707730105_07730Fig7.pdf]

## III<sub>4</sub> domain

Y973C

|         |                                                                                                           |
|---------|-----------------------------------------------------------------------------------------------------------|
| Human   | TVSPRDLQFVEVTDVKVTIMWTPPESAVTGYRVDVIPVNLPGEHGQRLPISRNTFAEVTGLSPGVTY <sup>Y</sup> YFKVFAVSHGRESKPLTAQQTT   |
| Mouse   | NVPPPTDLQFVELTDVKVTIMWTPPDSVVSgyrveVLPVSLPGEHGQRLPVNRNTFAEITGLSPGVTY <sup>Y</sup> LFKVFAVHQGRESNPLTAQQTT  |
| Bovine  | KVPPRDLQFVEVTDVKITIMWTPPESPVTGYRVDVIPVNLPGEHGQRLPVSrNTFAEVTGLSPGVTY <sup>Y</sup> HFKVFAVNQGRESKPLTAQQAT   |
| Chicken | EVSPKDLQFVEVSDVKVTIMWTPPQSQVSGYRVEAIPVNRPGQHGQRLPI TRSSF AEVVDLLPGTTY <sup>Y</sup> LFKIFAVSHGRESKPLTGEQTT |
| Rat     | DVPAPKDLQFVEVTDVKVTIMWTPPNSAVTGYRVDVLPVNLPGEHGQRLPVNRNTFAEVTGLSPGVTY <sup>Y</sup> LFKVFAVHQGRESKPLTAQQTT  |

## III<sub>13</sub> domain

W1925R

L1974R

|         |                                                                                                                                                                           |
|---------|---------------------------------------------------------------------------------------------------------------------------------------------------------------------------|
| Human   | NVSP <sup>P</sup> RRARVTDATETTTITIS <sup>W</sup> RTKTETITGFQVDAVPAN-GQTP <sup>I</sup> QRTIKPDV <sup>R</sup> SYTITGLQPGTDYKI <sup>Y</sup> LYTLNDNARSSPVVIDAST              |
| Mouse   | NVSP <sup>P</sup> RRARVTDATETTTITIS <sup>W</sup> RTKTETITGFQVDAIPAN-GQTPVQ <sup>R</sup> SISP <sup>D</sup> V <sup>R</sup> SYTITGLQPGTDYKI <sup>H</sup> LYTLNDNARSSPVVIDAST |
| Bovine  | NVSP <sup>P</sup> RRARVTDATETTTITIS <sup>W</sup> RTKTETITGFQVDAIPAN-GQTP <sup>I</sup> QRTIRPDV <sup>R</sup> SYTITGLQPGTDYKI <sup>H</sup> LYTLNDNARSSPVVIDAST              |
| Chicken | NVSP <sup>P</sup> RRARVTDATETTTITIT <sup>W</sup> RTKTETITGFQIDAIPAASGQNP <sup>I</sup> QRTISP <sup>D</sup> V <sup>R</sup> TYTITGLQPGNDYKI <sup>Y</sup> LYTLNENARSSPVVIDAST |
| Rat     | NVSP <sup>P</sup> RRARVTDATETTTITIS <sup>W</sup> RTKTETITGFQVDAIPAN-GQTPVQ <sup>R</sup> TISP <sup>D</sup> V <sup>R</sup> SYTITGLQPGTDYKI <sup>H</sup> LYTLNDNARSSPVVIDAST |
