# Supplementary material
Source: PubMed Central journal article supplement (PMC2268172)

**a**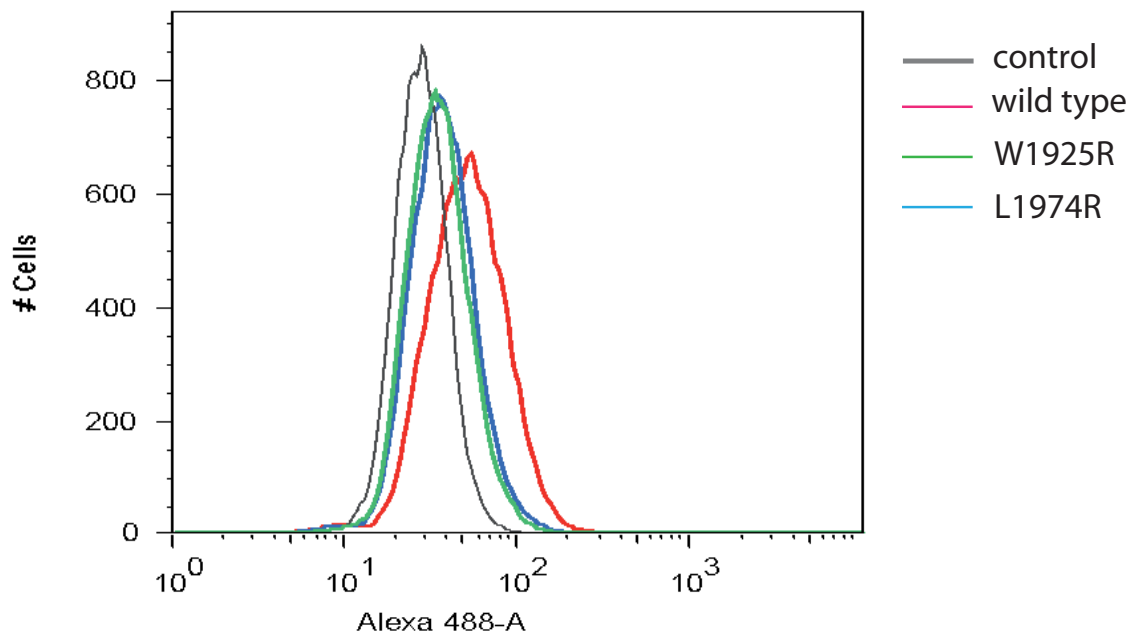**b**

wild type

W1925R

L1974R

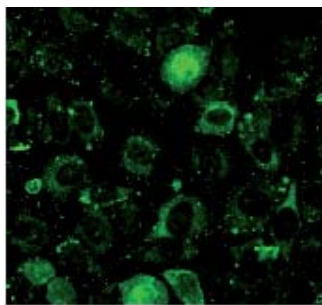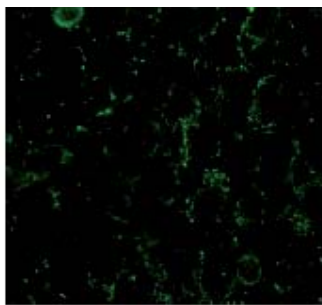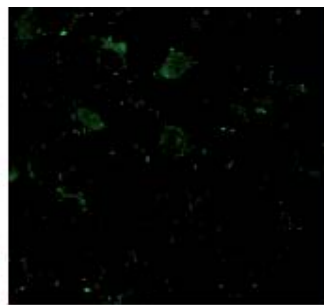

Supplement: supp_0707730105_07730Fig8.pdf [file supp_0707730105_07730Fig8.pdf]
